# Supplementary material for: Direct extracellular interaction between the early secreted antigen ESAT-6 of Mycobacterium tuberculosis and TLR2 inhibits TLR signaling in macrophages
Source: Springer Nature journal article supplement (doi:10.1038/ni1468), 2007-05-07
Supplement: ni1468-S8.pdf [file ni1468-S8.pdf]

Supplementary Table 1.

Sequences of overlapping peptides of ESAT-6

P1 MTEQQWNFAGIEAAASAIQG  
P2 AGIEAAASAIQGNVTSIHSL  
P3 AIQGNVTSIHSLLEDEGKQSL  
P4 IHSLLDEGKQSLTKLAAAWG  
P5 KQSLTKLAAAWGGSGSEAYQ  
P6 AAWGGSGSEAYQGVQQKWDA  
P7 EAYQGVQQKW DATATELNNA  
P8 KW DATATELNNALQNLARTI  
P9 LNNALQNLARTISEAGQAMA  
P10 ARTISEAGQAMASTE GNV TG  
P11 ISEAGQAMASTE GNV TG MFA

Primer sequences for PCR amplifications

| Gene                        | Primer sequences; restriction sites (bold)                                                                                           | Vector; restriction sites                     |
|-----------------------------|--------------------------------------------------------------------------------------------------------------------------------------|-----------------------------------------------|
| <i>esx A</i>                | Forward: 5'-CG <b>GAATTC</b> ATGACAGAGCAGTGG-3', <i>EcoRI</i><br>Reverse: 5'-CG <b>GGATCC</b> CTATGCGAACATCCC-3', <i>BamHI</i>       | pFLAG-CMV6a;<br><i>EcoRI</i> and <i>BamHI</i> |
| <i>Tlr2</i><br>(ectodomain) | Forward: 5'-ATA <b>AGATCT</b> CAGGACTCTCTGTCATGT-3', <i>BglII</i><br>Reverse 5'-ATA <b>CTCGAGT</b> CACTGGTGACATTCCAA-3', <i>XhoI</i> | pET28a;<br><i>BamHI</i> and <i>XhoI</i>       |
